# Supplementary material for: Intrinsic MRI contrast from amino acid-based paramagnetic ionic liquids
Source: Royal Society of Chemistry journal article supplement (doi:10.1039/d0ma00339e), 2020-01-01
Supplement: d0ma00339e1.pdf [file d0ma00339e1.pdf]

## Supporting Information

### **Intrinsic MRI contrast from Amino Acid based Paramagnetic Ionic Liquids**

Praveen Singh Gehlot,<sup>ab</sup> Hariom Gupta,<sup>ac</sup> Mangal Singh Rathore,<sup>a</sup> Kusum Khatri<sup>a</sup> Arvind Kumar<sup>\*a</sup>

<sup>a</sup>Academy of Scientific and Innovative Research (AcSIR), Ghaziabad-201002, India. CSIR-Central Salt and Marine Chemicals Research Institute, Council of Scientific and Industrial Research, G. B. Marg, Bhavnagar, 364002, Gujarat India.

<sup>b</sup>Department of Chemistry, Government Science College, Pardi, Valsad-396125, Gujarat, India.

<sup>c</sup>Analytical Chemistry Division, CSIR-Central Institute of Medicinal and Aromatic Plants (CSIR-CIMAP) Lucknow, India.

\*E-mail: mailme\_arvind@yahoo.com; arvind@csmcri.res.in Tel.: +91-278-2567039. Fax: +91-278-2567562

ORCID ID: Arvind Kumar: 0000-0001-9236-532X

Praveen Singh Gehlot: 0000-0002-5569-8296

Hariom Gupta: 0000-0003-4565-0448

| <b>Content</b>                                                                                                                         | <b>Page</b>  |
|----------------------------------------------------------------------------------------------------------------------------------------|--------------|
| <b>Table S1: Elemental analysis.</b>                                                                                                   | <b>2</b>     |
| <b>Table S2: Glass transition temperature, degradation temperature, and Fe % for PMILs (a = observed at present room temperature).</b> | <b>3</b>     |
| <b>Figure S1: NMR spectra of PMILs.</b>                                                                                                | <b>3-6</b>   |
| <b>Figure S2: Raman spectra of [FeCl<sub>4</sub>]<sup>-</sup> anion in various PMILs.</b>                                              | <b>7</b>     |
| <b>Figure S3: EPR spectra of [FeCl<sub>4</sub>]<sup>-</sup> anion in various PMILs.</b>                                                | <b>8</b>     |
| <b>Figure S4: DSC and TGA Traces of PMILs.</b>                                                                                         | <b>9-10</b>  |
| <b>Figure S5: CD spectra of DNA in the presence of PMILs and CD spectrum of pure DNA.</b>                                              | <b>11</b>    |
| <b>Figure S6: Fluorescence spectra of EB-DNA complex in the presence of PMILs.</b>                                                     | <b>11-12</b> |
| <b>Figure S7: Isothermal binding of PMILs with DNA at various Fe concentration.</b>                                                    | <b>12</b>    |
| <b>Figure S8: Zeta potential of DNA at various concentration of Fe for different PMILs.</b>                                            | <b>13</b>    |

|                    |                                                                                                                                                                     |           |
|--------------------|---------------------------------------------------------------------------------------------------------------------------------------------------------------------|-----------|
| <b>Figure S9:</b>  | <b>Agarose gel-electrophoresis electrophoresis pattern of DNA in the presence of PMILs and Gd-BOPTA with different metal concentration.</b>                         | <b>14</b> |
| <b>Figure S10:</b> | <b>MRI T<sub>1</sub> and T<sub>2</sub> images for AlaC<sub>1</sub>[FeCl<sub>4</sub>] and Val C<sub>1</sub>[FeCl<sub>4</sub>] PMILs at various Fe concentration.</b> | <b>15</b> |
| <b>Figure S11:</b> | <b>Relaxitivity profile for AlaC<sub>1</sub>[FeCl<sub>4</sub>] and Val C<sub>1</sub>[FeCl<sub>4</sub>] PMILs.</b>                                                   | <b>15</b> |
| <b>Figure S12:</b> | <b>CD, Fluorescence, ITC, and Zeta potential profile of Gd-BOPTA.</b>                                                                                               | <b>16</b> |
| <b>Figure S13:</b> | <b>Mass spectra of Pro[FeCl<sub>4</sub>], ProC<sub>1</sub>[FeCl<sub>4</sub>], Glu[FeCl<sub>4</sub>] and GluC<sub>1</sub>[FeCl<sub>4</sub>].</b>                     | <b>16</b> |

## Characterization

The chemical structure (Table 1) of synthesized PMILs has been analyzed through MS (MicroMass Q-TOF) and <sup>1</sup>H NMR (Brüker 500 MHz) techniques. MS of PMILs were performed in methanol solvent and for <sup>1</sup>H NMR PMILs were ultra-diluted in deuterated methanol solvent to avoid inherent magnetization for achieving good spectra. Elemental analysis (Table S1) was carried out with CHNS-15111009 Elementar Vario-Micro tube, Germany; and absolute Fe% composition in PMILs was determined by Perkin Elmer ICP optima 2000 DV ICP-OES (Inductively Coupled Plasma–Optical Emission Spectroscopy) analyser (Table S2). The osmolality of PMILs was measured from WESCOR<sup>®</sup> Vapro<sup>®</sup> vapor pressure osmometer (Table 1).

**Table S1.** Elemental analysis.

| PMILs                                  | C%    |       | N%   |      | H%   |      |
|----------------------------------------|-------|-------|------|------|------|------|
|                                        | Cal   | Obs   | Cal  | Obs  | Cal  | Obs  |
| Pro[FeCl <sub>4</sub> ]                | 19.14 | 18.99 | 4.46 | 4.12 | 3.21 | 3.02 |
| ProC <sub>1</sub> [FeCl <sub>4</sub> ] | 21.98 | 22.01 | 4.27 | 4.20 | 3.69 | 3.81 |
| Glu[FeCl <sub>4</sub> ]                | 17.34 | 17.01 | 4.05 | 4.21 | 2.92 | 2.88 |
| GluC <sub>1</sub> [FeCl <sub>4</sub> ] | 22.49 | 22.90 | 3.75 | 3.55 | 3.77 | 3.78 |
| Ala[FeCl <sub>4</sub> ]                | 15.92 | 16.23 | 4.64 | 4.52 | 3.34 | 3.33 |
| Val[FeCl <sub>4</sub> ]                | 21.85 | 22.10 | 4.25 | 4.62 | 4.28 | 4.12 |

**Table S2.** Glass transition temperature, degradation temperature, and Fe % for PMILs (a = observed at present room temperature)

| PMILs                                  | T <sub>g</sub> (DSC)<br>°C | T <sub>d</sub> (TGA)<br>°C | % Fe (ICP) | State <sup>a</sup> |
|----------------------------------------|----------------------------|----------------------------|------------|--------------------|
| Pro[FeCl <sub>4</sub> ]                | -59                        | 238                        | 14.3       | Liquid             |
| ProC <sub>1</sub> [FeCl <sub>4</sub> ] | 67                         | 236                        | 18.3       | Solid              |
| Glu[FeCl <sub>4</sub> ]                | -54                        | 233                        | 12.7       | Liquid             |
| GluC <sub>1</sub> [FeCl <sub>4</sub> ] | -55                        | 240                        | 12.9       | Liquid             |
| Ala[FeCl <sub>4</sub> ]                | -47                        | 210                        | 19.7       | Liquid             |
| Val[FeCl <sub>4</sub> ]                | -29                        | 231                        | 17.1       | Liquid             |

### NMR spectra of PMILs.

- <sup>1</sup>H NMR of Pro[FeCl<sub>4</sub>]: Chemical shift (δ) 2.11 (m, 4H), 2.44 (m, 1H), 3.87 (m, 2H), 4.42 (s, 1H) LCMS Data: ESI<sup>+</sup> (m/z) 116.2 for [C<sub>5</sub>H<sub>10</sub>NO<sub>2</sub>]<sup>+</sup>, ESI<sup>-</sup> (m/z) 197.80 for [FeCl<sub>4</sub>]<sup>-</sup>

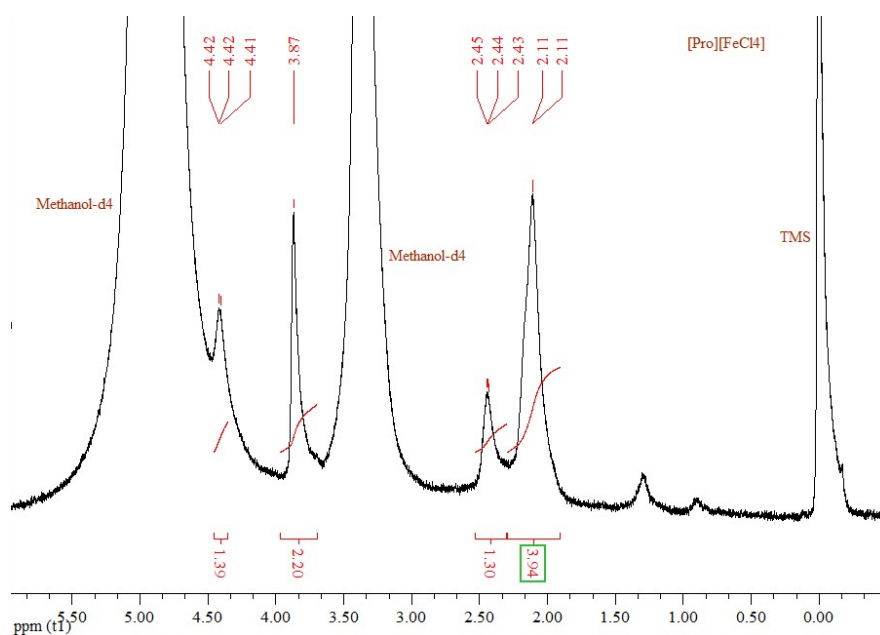

2.  $^1\text{H}$  NMR of  $\text{Glu}[\text{FeCl}_4]$ : Chemical shift ( $\delta$ , ppm) 1.18 (t, 2H), 2.13 (d, 2H), 3.76 (t, 1H), LCMS Data: ESI<sup>+</sup> (m/z) 148.1 for  $[\text{C}_5\text{H}_{10}\text{NO}_4]^+$ , ESI<sup>-</sup> (m/z) 197.80 for  $[\text{FeCl}_4]^-$

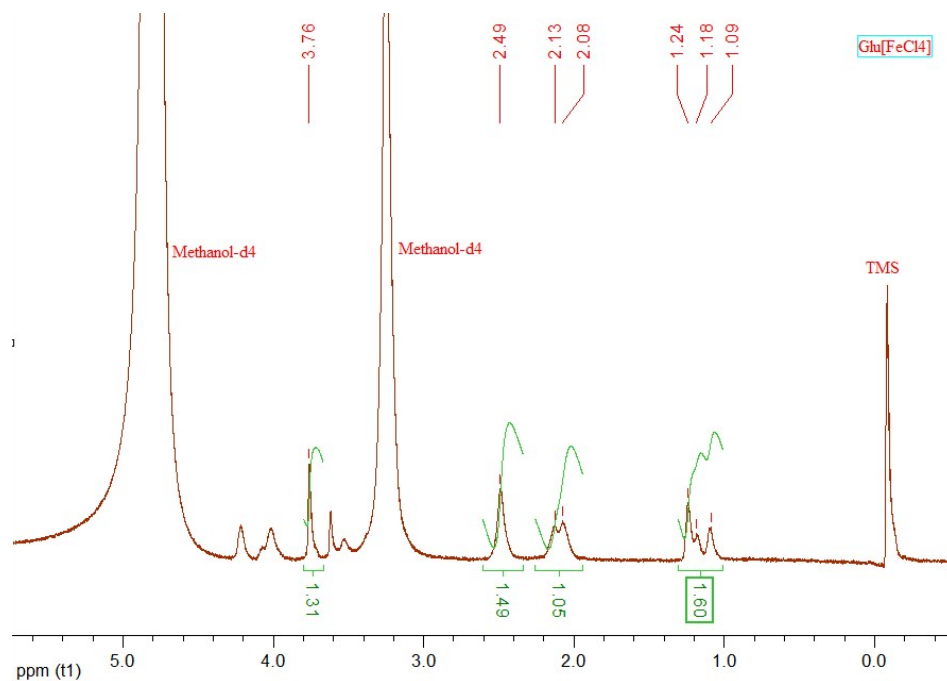

3.  $^1\text{H}$  NMR of  $\text{GluC}_1[\text{FeCl}_4]$ : Chemical shift ( $\delta$ ) 2.2 (m, 2H), 2.58 (m, 2H), 3.7(S, 3H), 3.7(S, 3H), 3.8 (S, 3H), 4.1(m,1H). LCMS Data: ESI<sup>+</sup> (m/z) 176.1 for  $[\text{C}_7\text{H}_{14}\text{NO}_4]^+$ , ESI<sup>-</sup> (m/z) 197.80 for  $[\text{FeCl}_4]^-$

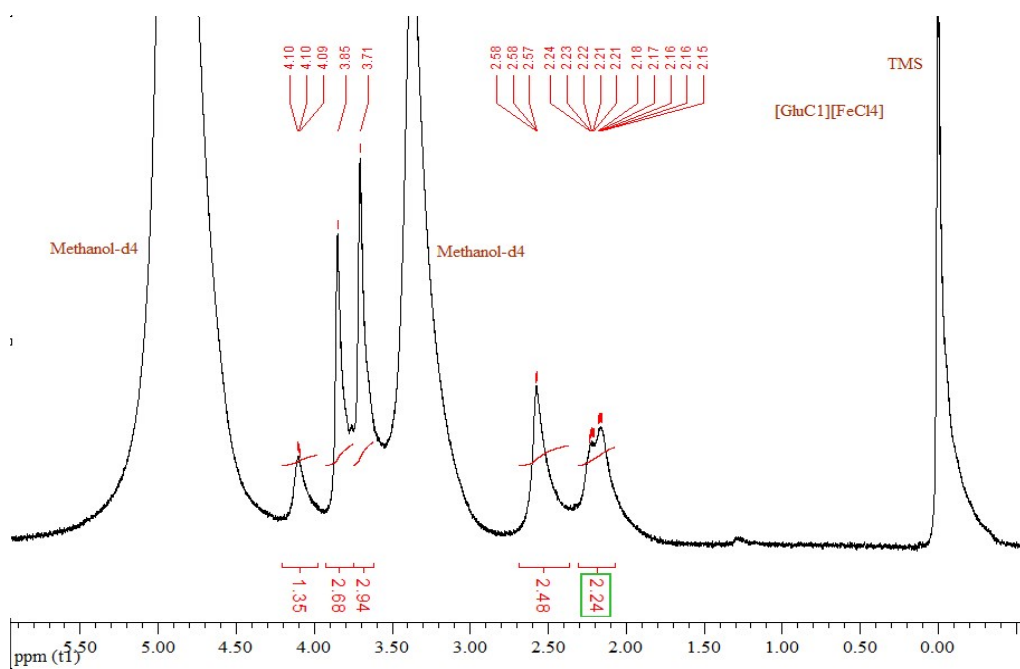

4.  $^1\text{H}$  NMR of  $\text{ProC}_1[\text{FeCl}_4]$ : Chemical shift ( $\delta$ ) 2.08 (m,4H), 2.41(m,1H), 3.39 (m, 2H), 3.86 (S, 3H), 4.42 (m,1H). LCMS Data: ESI $^+$  (m/z) 130.09 for  $[\text{C}_6\text{H}_{12}\text{NO}_2]^+$ , ESI $^-$  (m/z) 197.80 for  $[\text{FeCl}_4]^-$

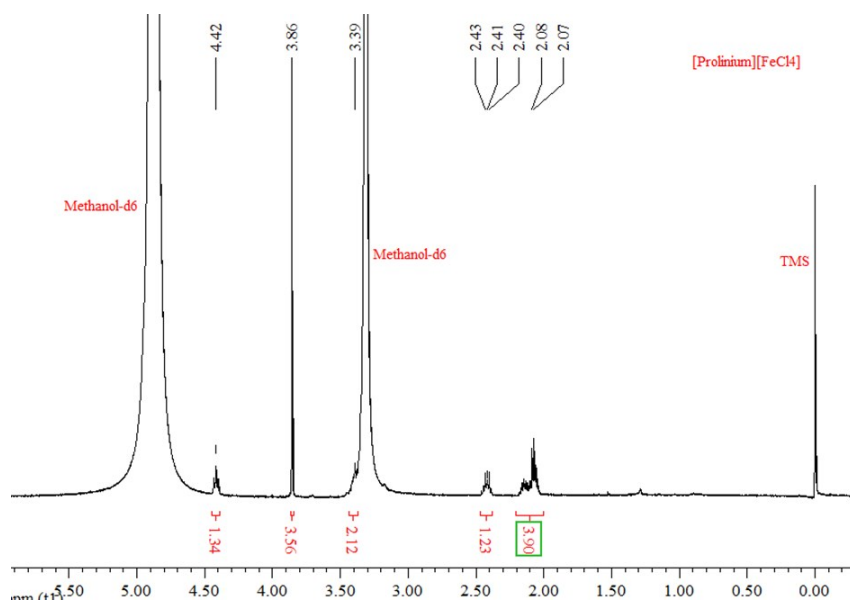

5.  $^1\text{H}$  NMR of  $\text{AlaC}_1[\text{FeCl}_4]$ : Chemical shift ( $\delta$ ) 1.54 (m,3H), 3.84(s,3H), 4.1 (m, 1H). LCMS Data: ESI $^+$  (m/z) 104.03 for  $[\text{C}_3\text{H}_8\text{NO}_2]^+$ , ESI $^-$  (m/z) 197.80 for  $[\text{FeCl}_4]^-$

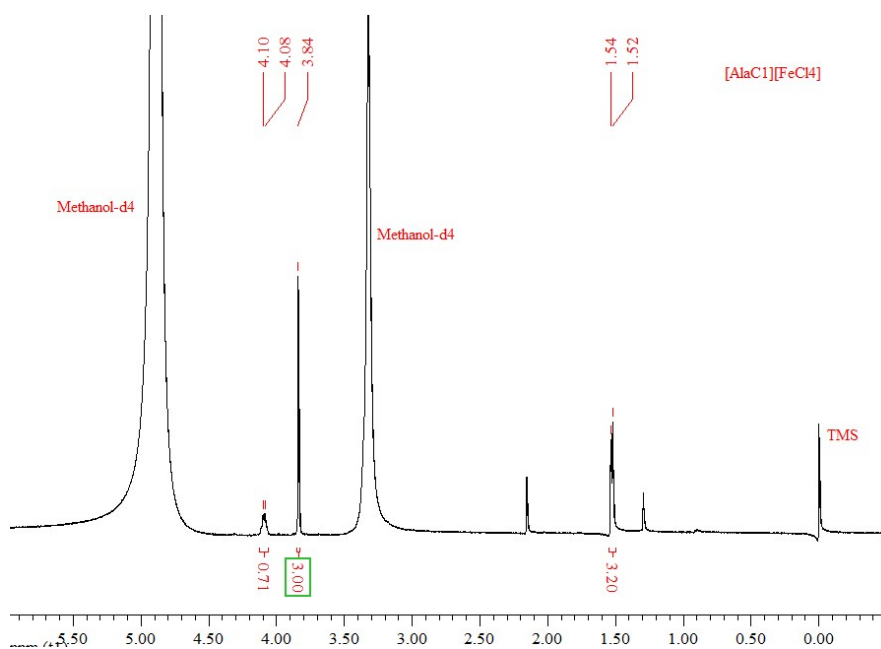

6.  $^1\text{H}$  NMR of  $\text{ValC}_1[\text{FeCl}_4]$  Chemical shift ( $\delta$ ) 1.07 (d,6H), 2.28(m,1H), 3.85 (s, 3H), 3.92 (m, 1H). LCMS Data: ESI<sup>+</sup> (m/z) 132.1 for  $[\text{C}_5\text{H}_{12}\text{NO}_2]^+$ , ESI<sup>-</sup> (m/z) 197.80 for  $[\text{FeCl}_4]^-$

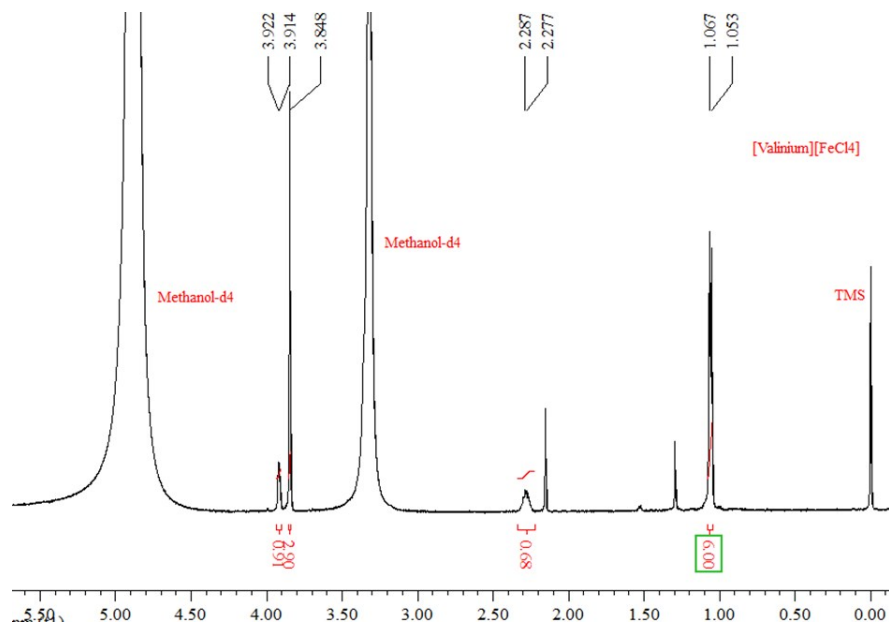

**Figure S1.** NMR spectra of PMILs.

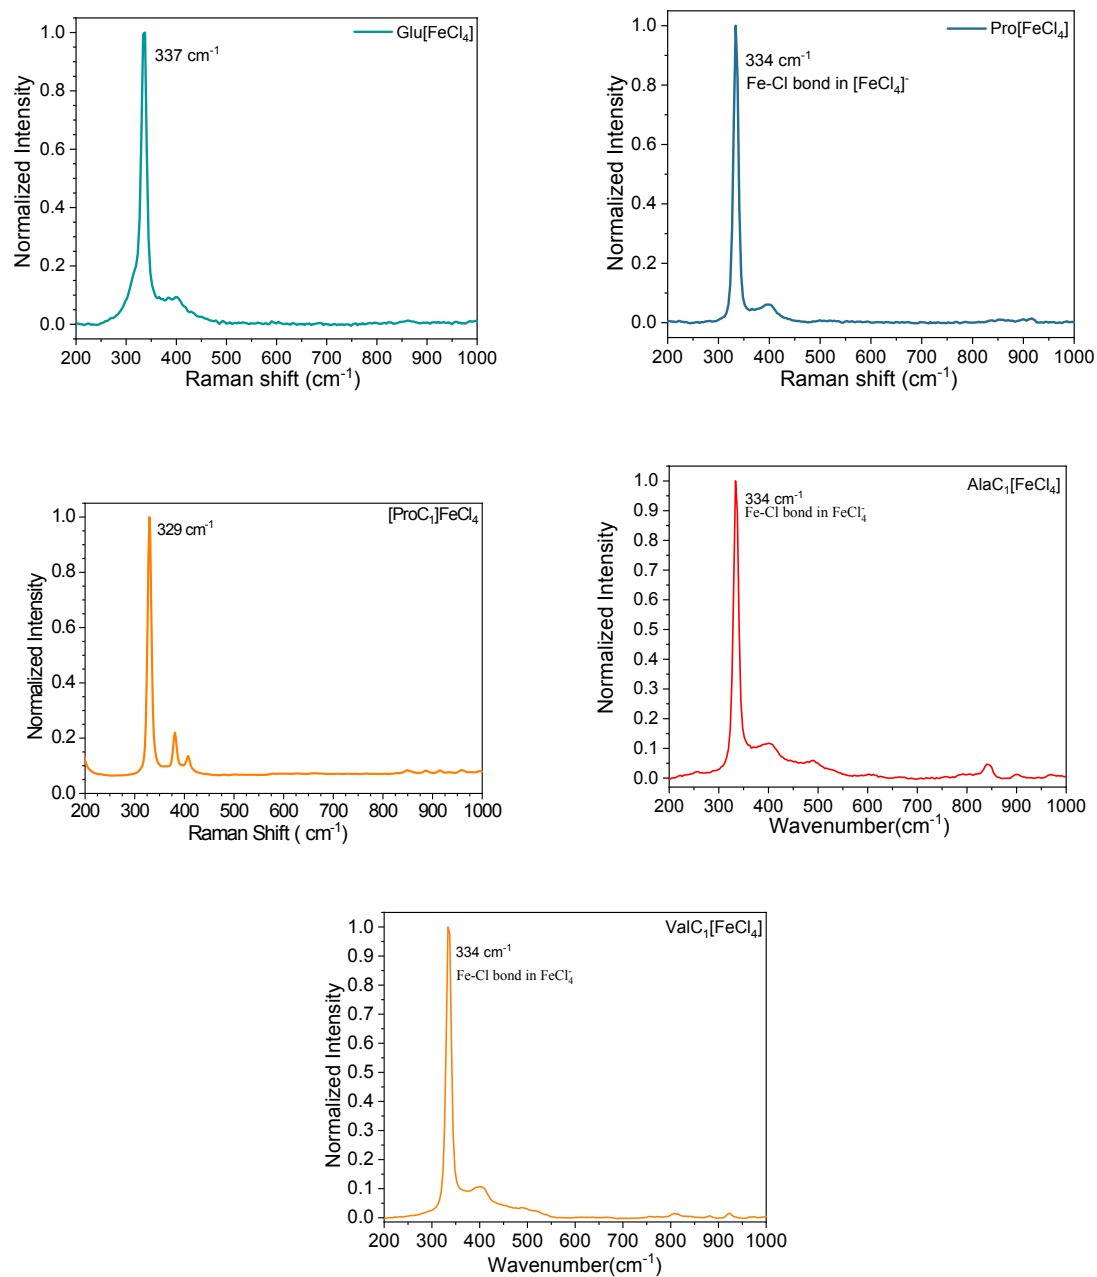

**Figure S2.** Raman spectra of [FeCl<sub>4</sub>]<sup>-</sup> anion in various PMILs.

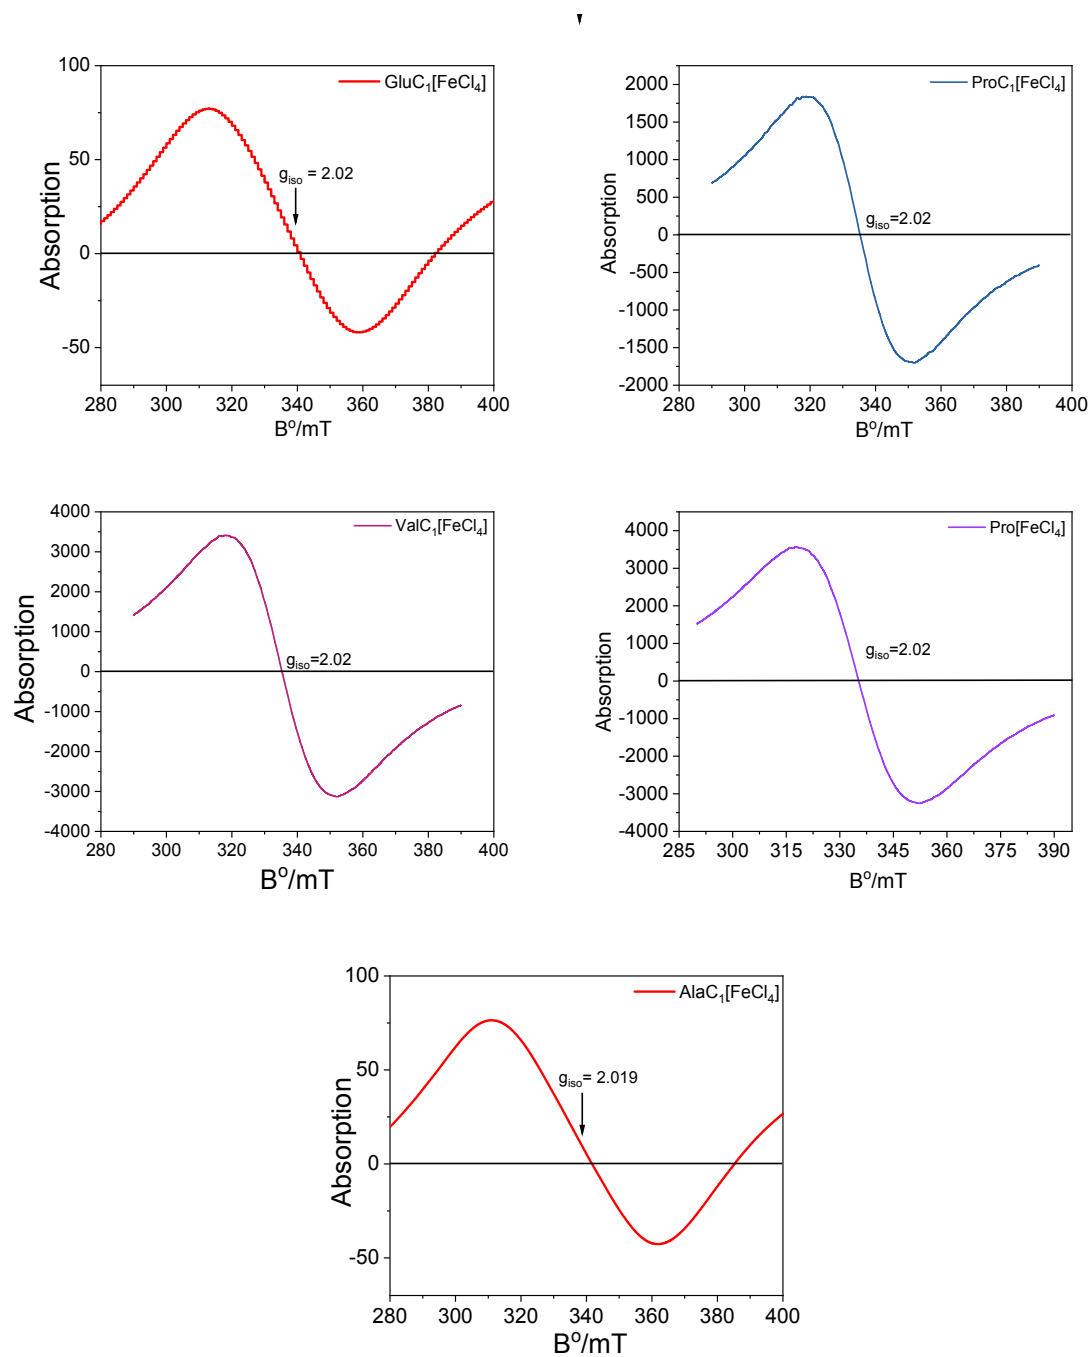

**Figure S3.** EPR spectra of  $[\text{FeCl}_4]^-$  anion in various PMILs.



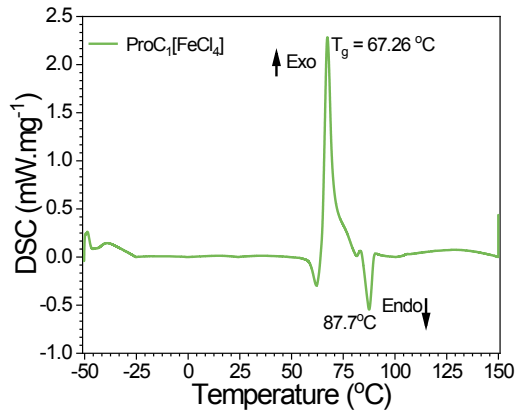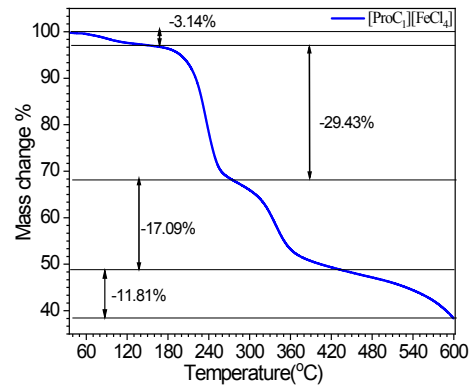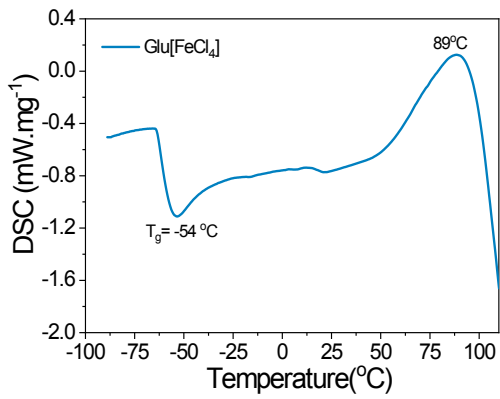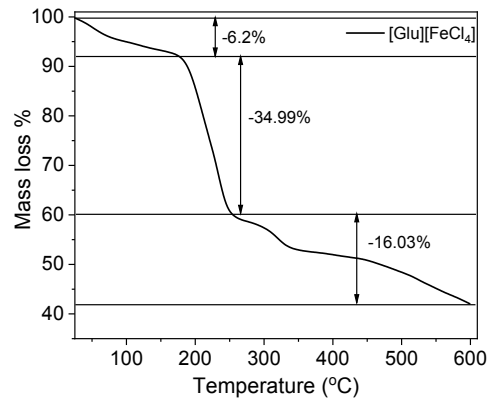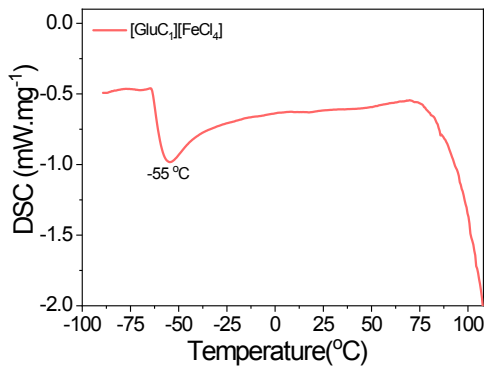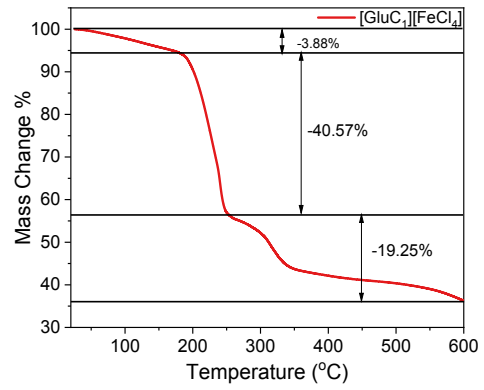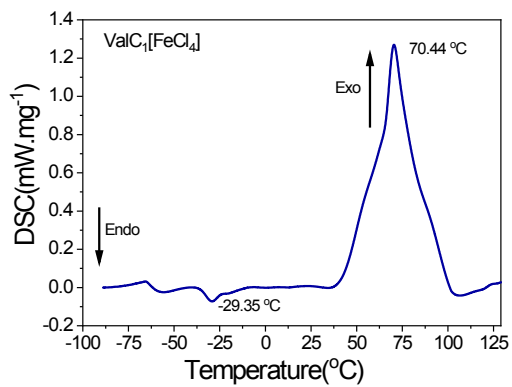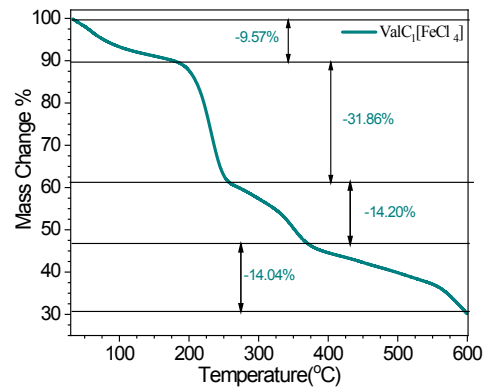

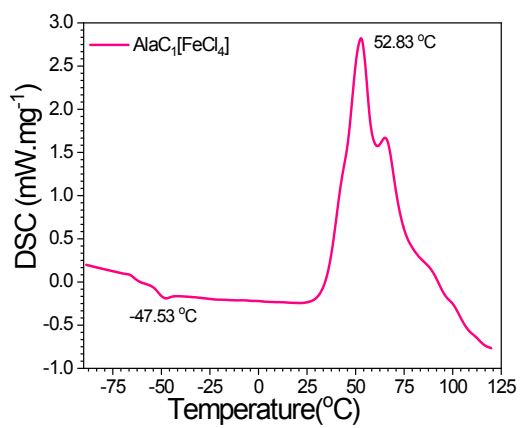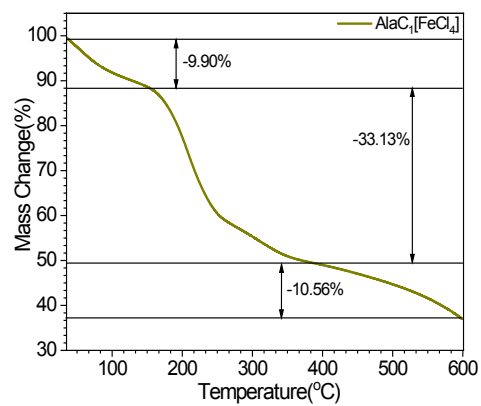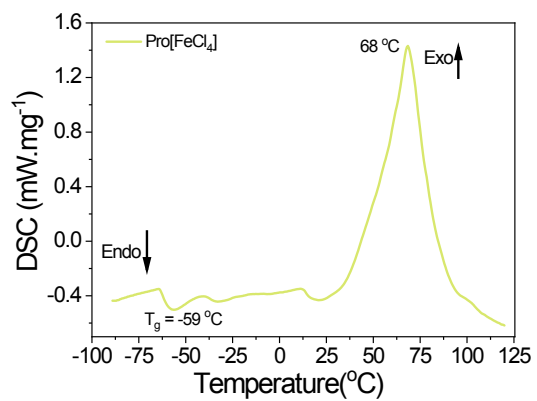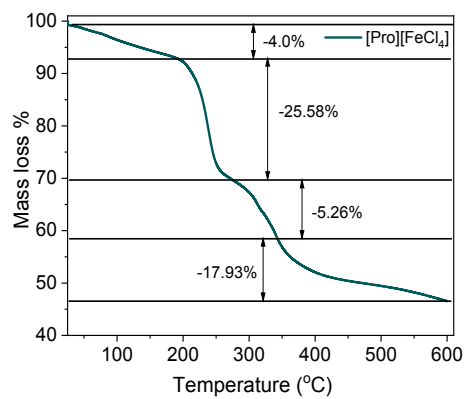

**Figure S4.** DSC and TGA traces of PMILs.

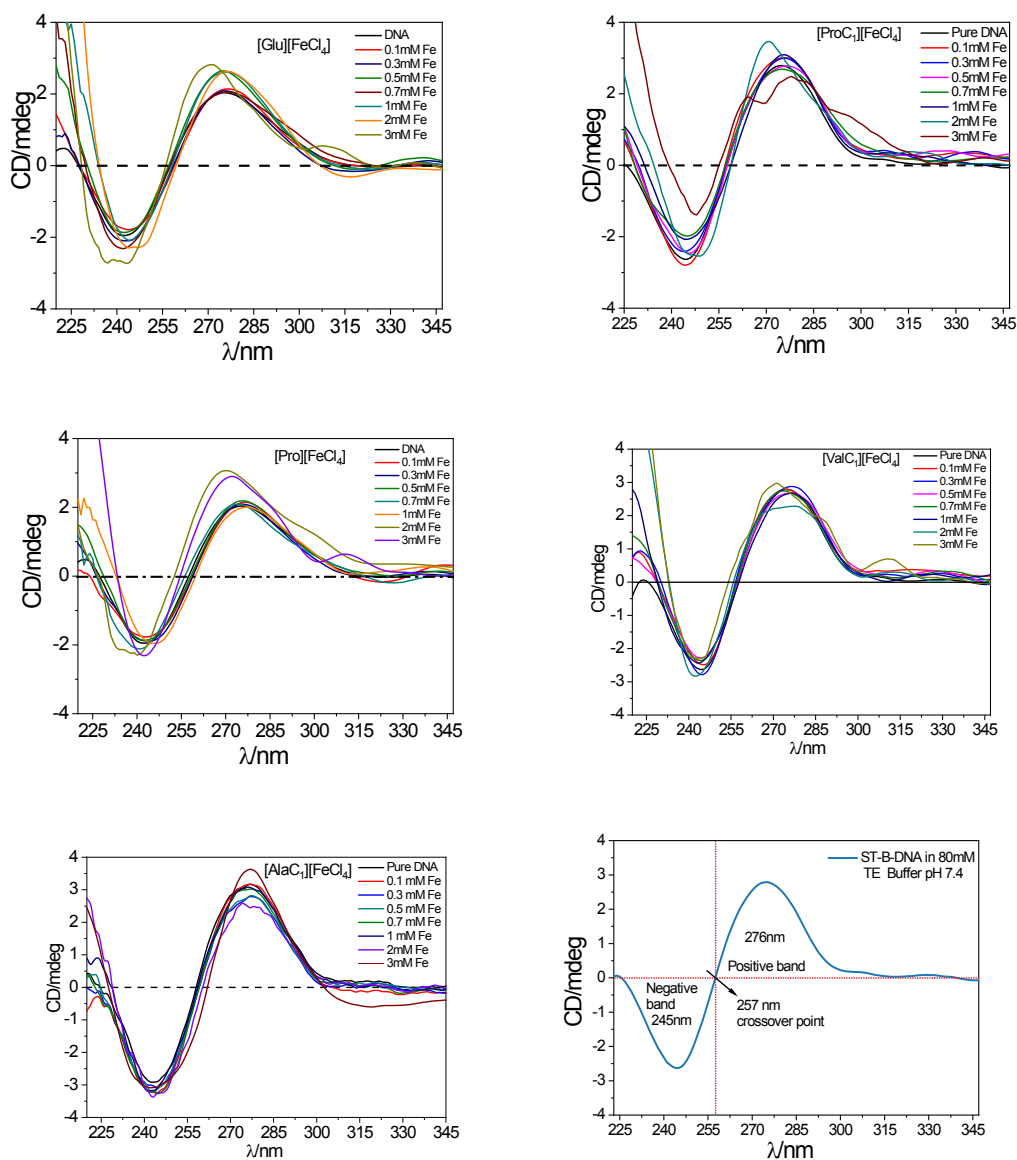

**Figure S5.** CD spectra of DNA in the presence of PMILs and CD spectrum of pure DNA.

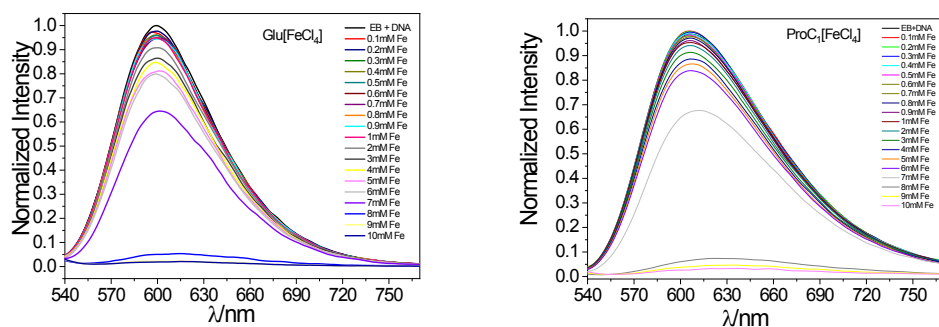

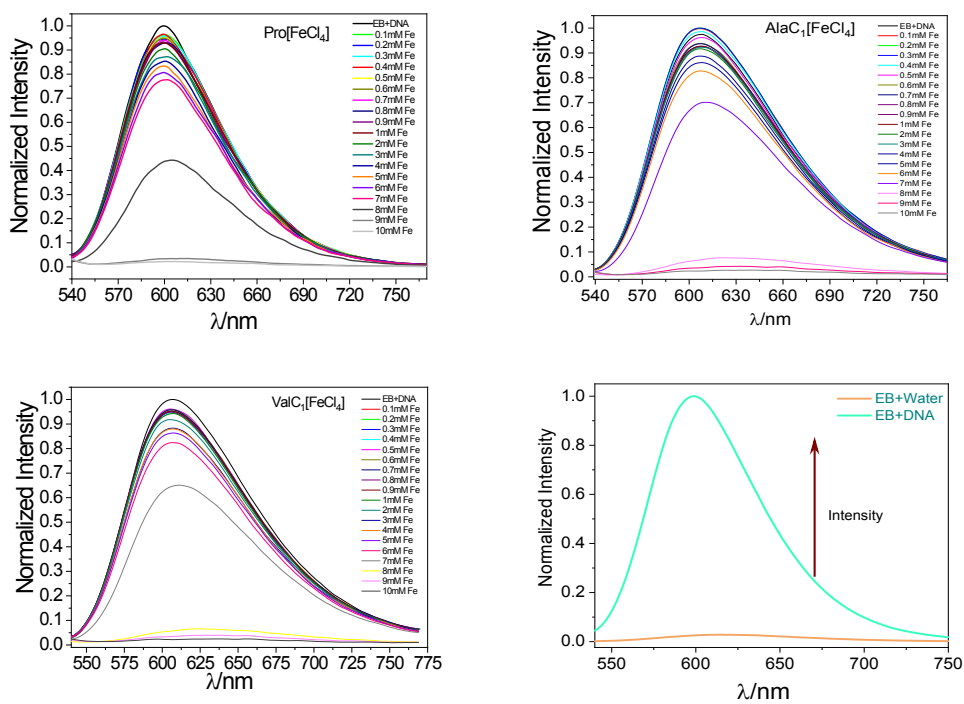

Figure S6. Fluorescence spectra of EB-DNA complex in the presence of PMILs.

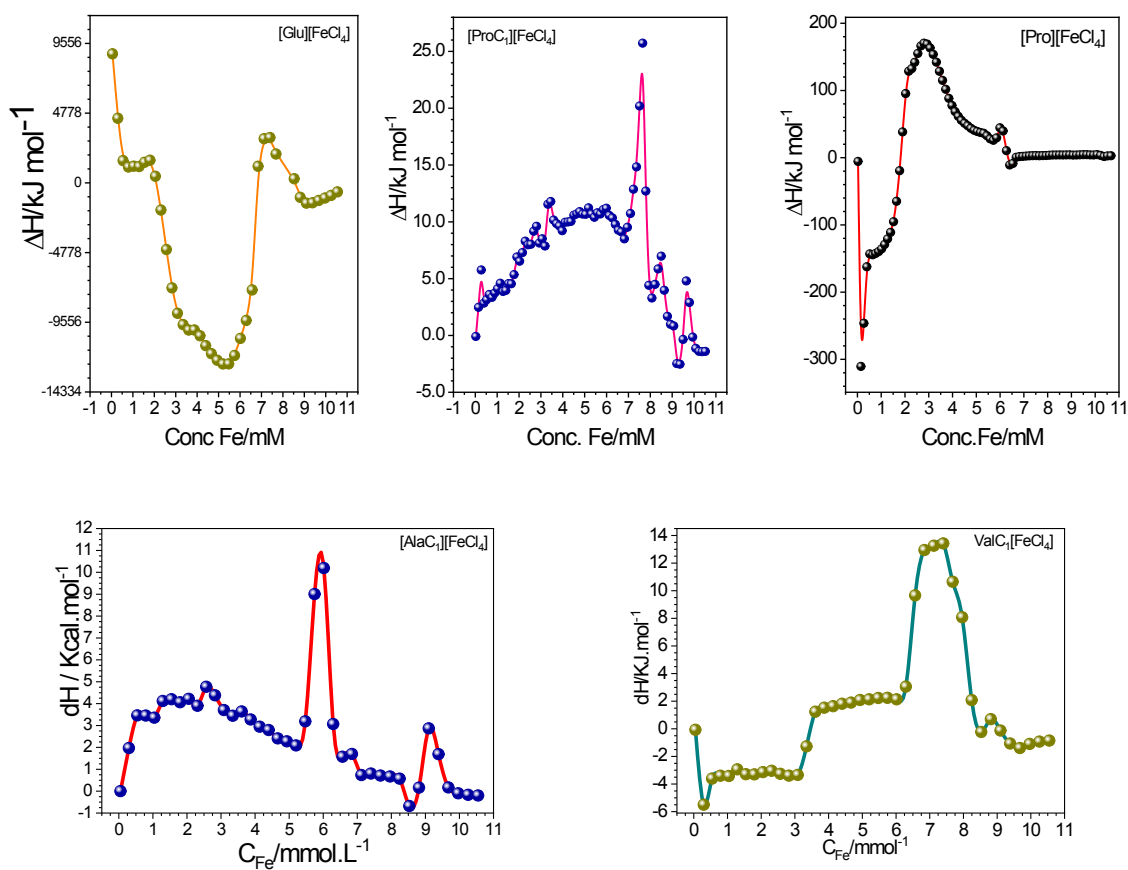

Figure S7. Isothermal binding of PMILs with DNA at various Fe concentration.

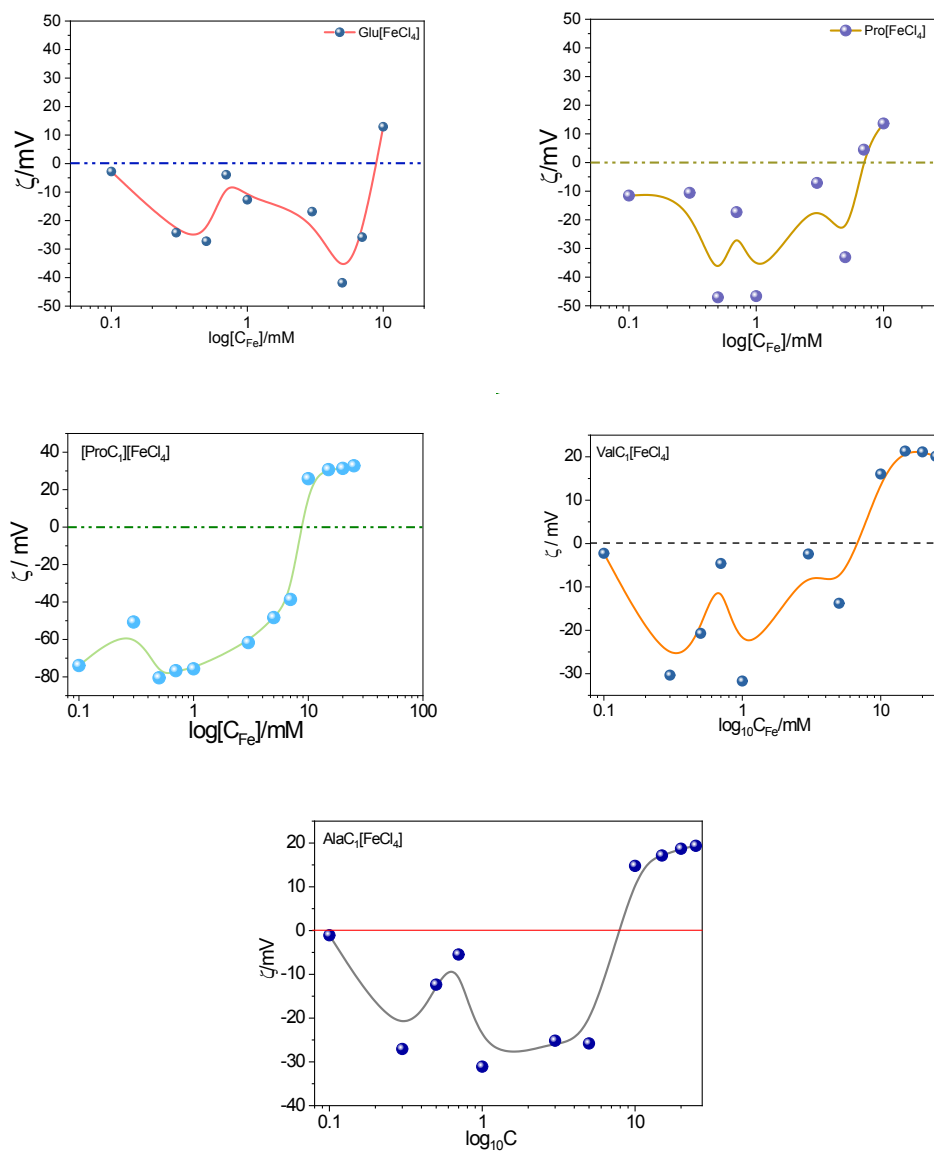

**Figure S8.** Zeta potential of DNA at various concentration of Fe for different PMILs.

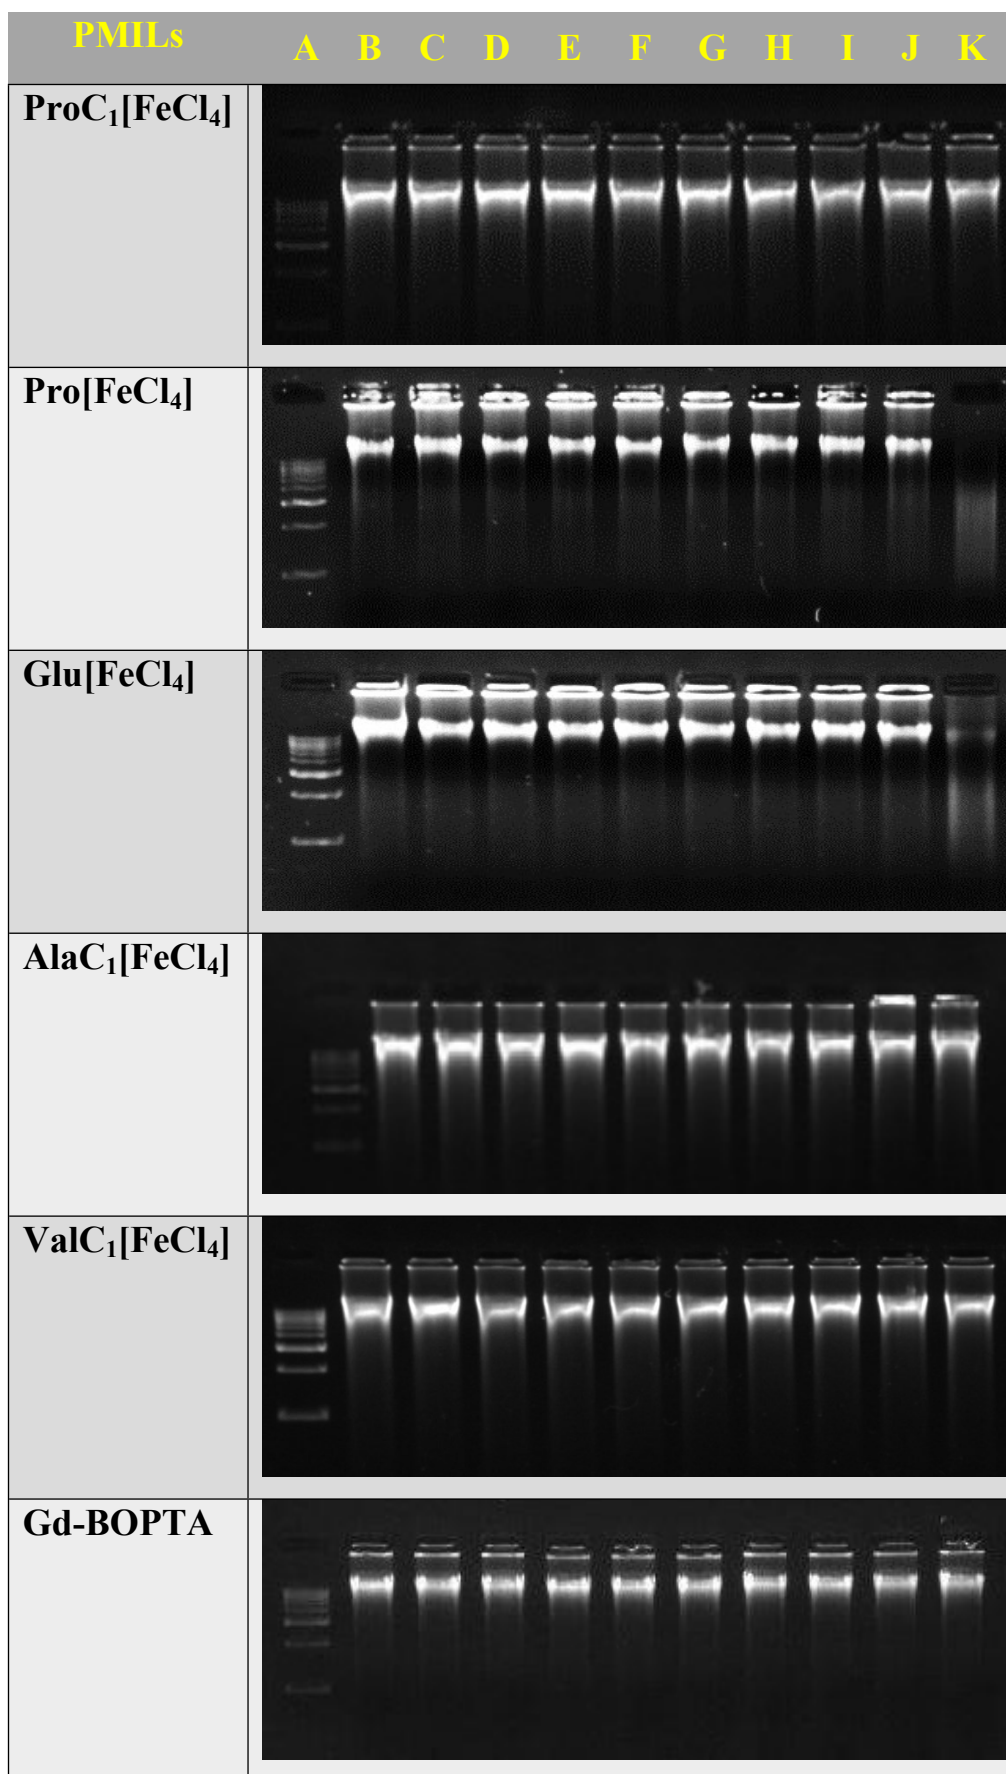

**Figure S9.** Agarose gel-electrophoresis electrophoresis pattern of DNA in the presence of PMILs and Gd-BOPTA with different metal concentration. (Where, A =

ladder, B= pure DNA, C= 0.1, D= 0.3, E=0.5, F=0.7, G=1.0, H=2.0, I=3.0, J=4.0, K=5.0 mmol.L<sup>-1</sup>)

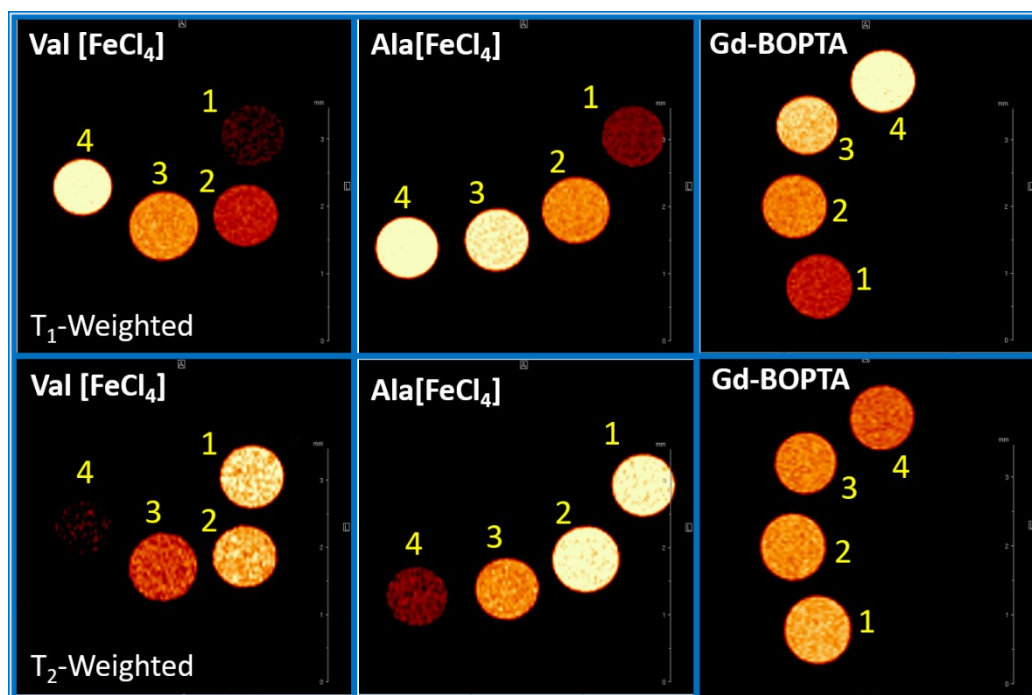

**Figure S10.** MRI T<sub>1</sub> and T<sub>2</sub> images at various Fe concentration (1 = 0.3, 2 = 0.5, 3 = 0.7 and 4 = 1mM Fe).

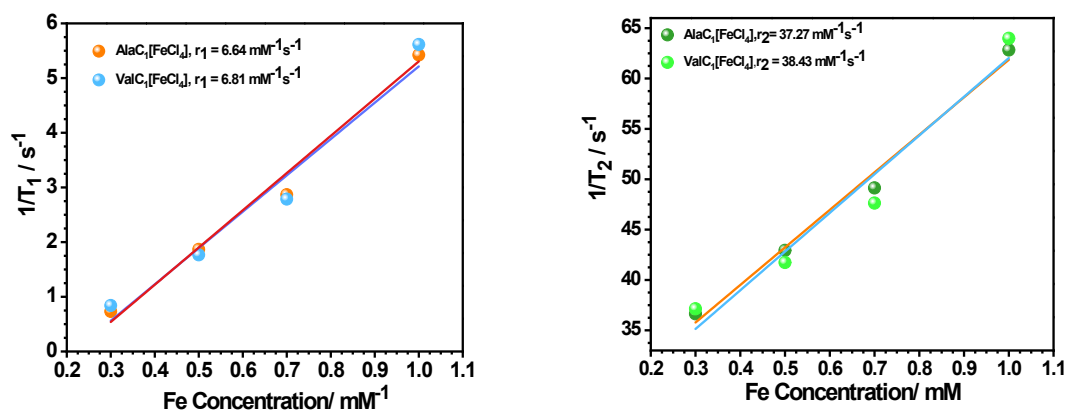

**Figure S11.** Relaxivity profile for AlaC<sub>1</sub>[FeCl<sub>4</sub>] and ValC<sub>1</sub>[FeCl<sub>4</sub>] PMILs.

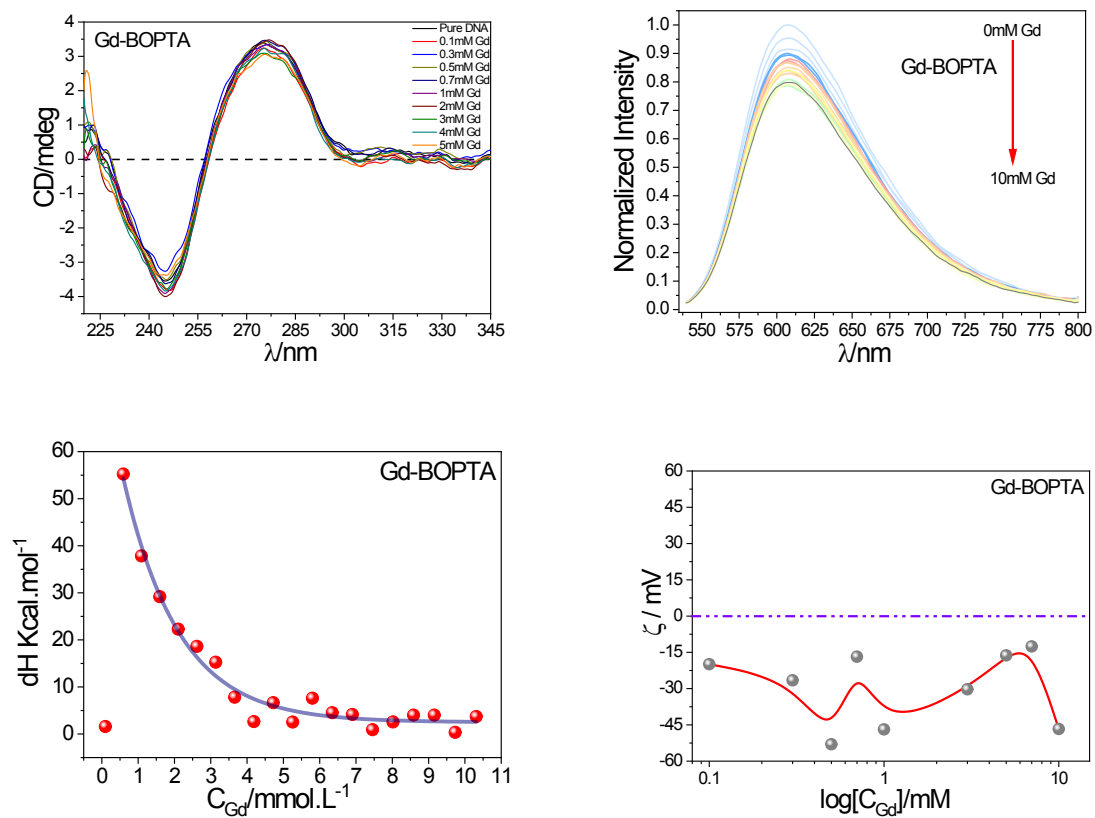

**Figure S12.** CD, Fluorescence, ITC, and Zeta potential profile of Gd-BOPTA.

## Mass spectra of PMILs

1. LCMS Data of Pro[FeCl<sub>4</sub>]: ESI<sup>+</sup> (m/z) 116.1 for [C<sub>5</sub>H<sub>10</sub>NO<sub>2</sub>]<sup>+</sup>, ESI<sup>-</sup> (m/z) 197.80 for [FeCl<sub>4</sub>]<sup>-</sup>

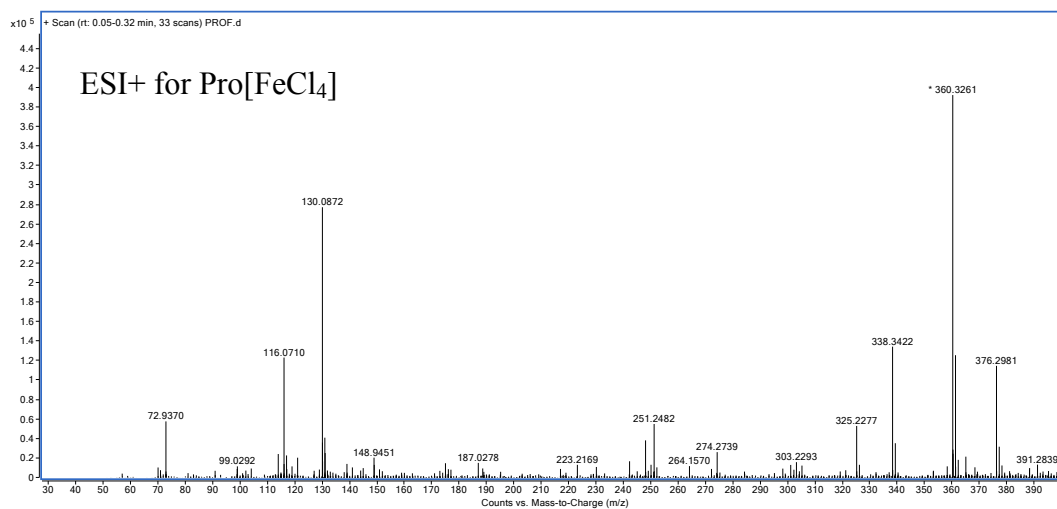



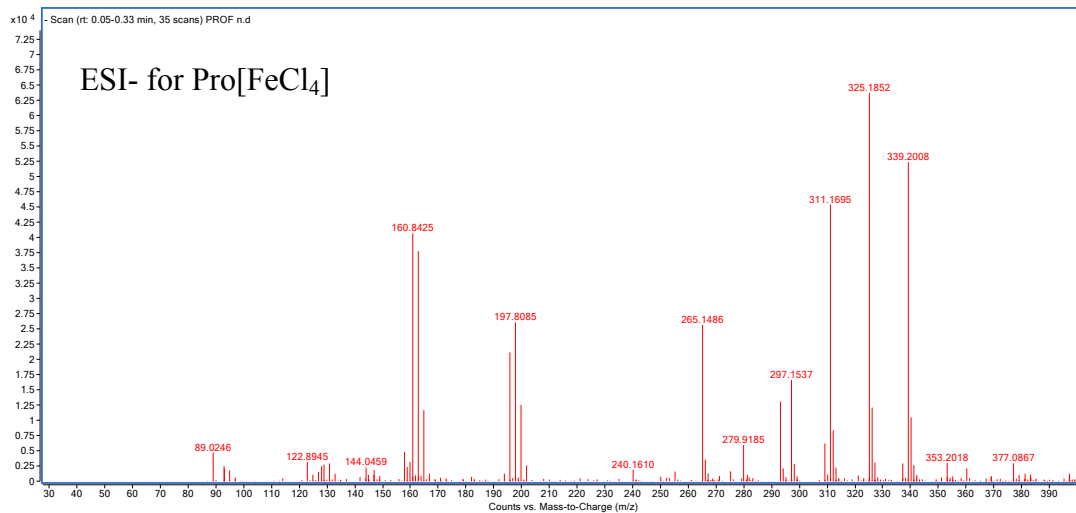

2. LCMS Data of Glu[FeCl<sub>4</sub>]: ESI<sup>+</sup> (m/z) 148.2 for [C<sub>5</sub>H<sub>10</sub>NO<sub>4</sub>]<sup>+</sup>, ESI<sup>-</sup> (m/z) 197.80 for [FeCl<sub>4</sub>]<sup>-</sup>

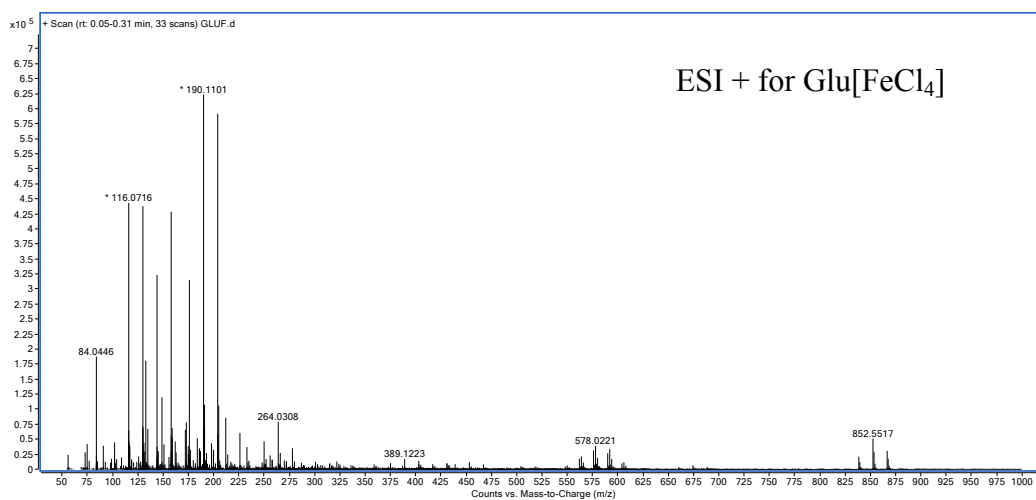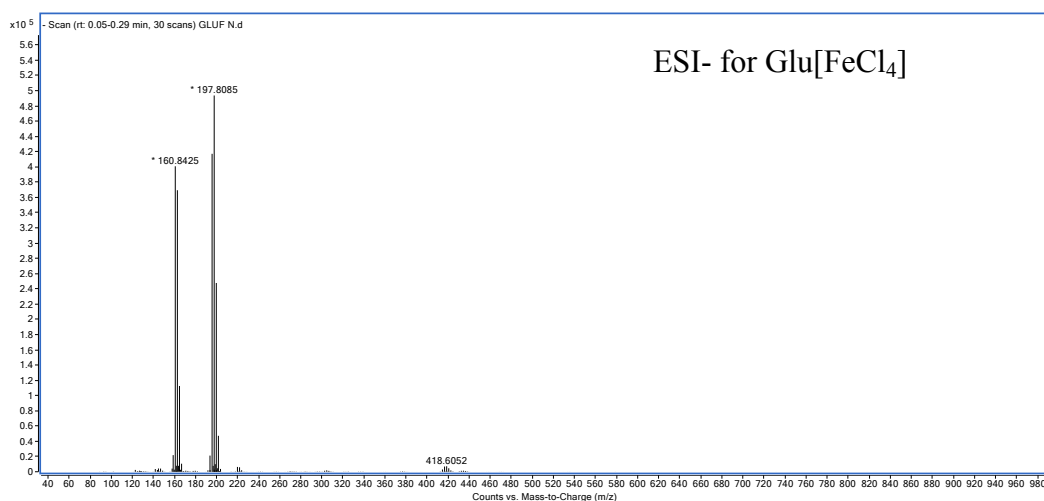

3. LCMS Data of  $\text{GluC}_1[\text{FeCl}_4]$ :  $\text{ESI}^+$  (m/z) 176.1 for  $[\text{C}_7\text{H}_{14}\text{NO}_4]^+$ ,  $\text{ESI}^-$  (m/z) 197.80 for  $[\text{FeCl}_4]^-$

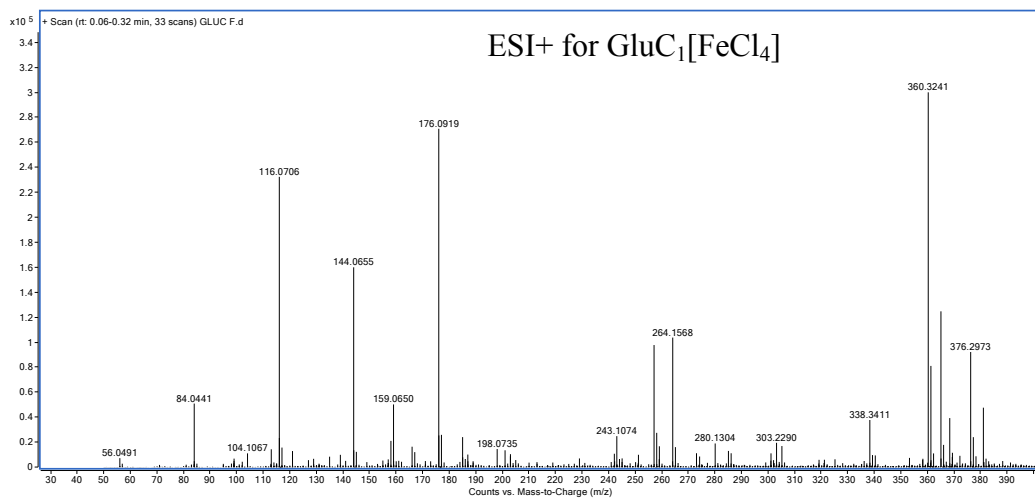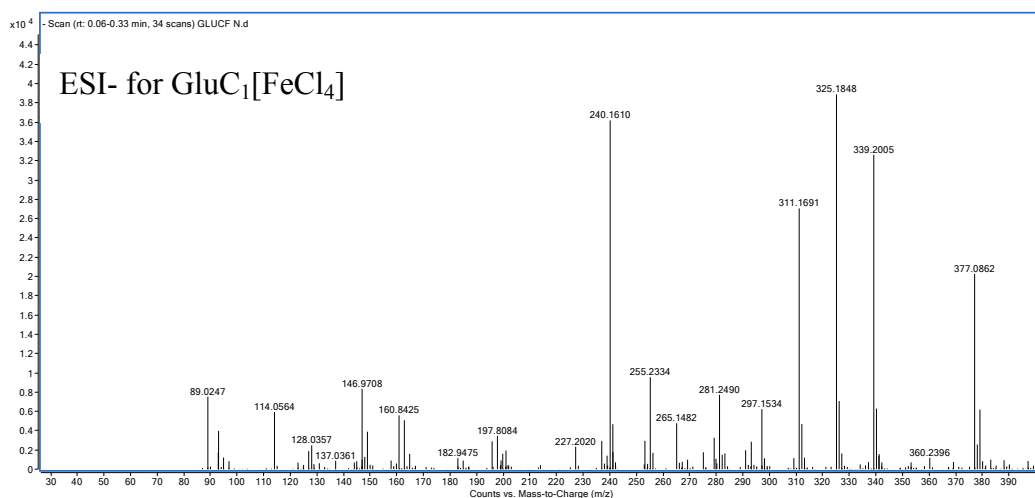

4. LCMS Data of  $\text{ProC}_1[\text{FeCl}_4]$ :  $\text{ESI}^+$  (m/z) 130.09 for  $[\text{C}_6\text{H}_{12}\text{NO}_2]^+$ ,  $\text{ESI}^-$  (m/z) 197.80 for  $[\text{FeCl}_4]^-$

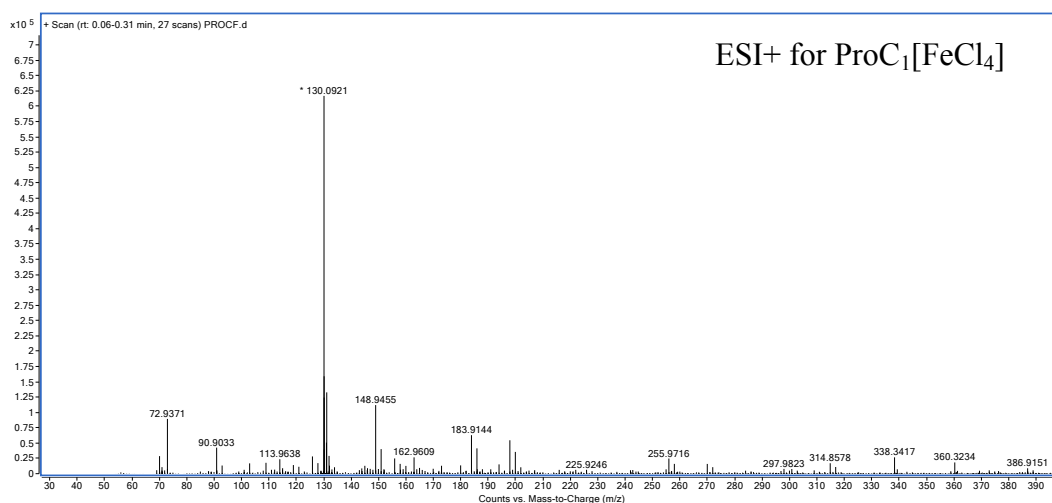

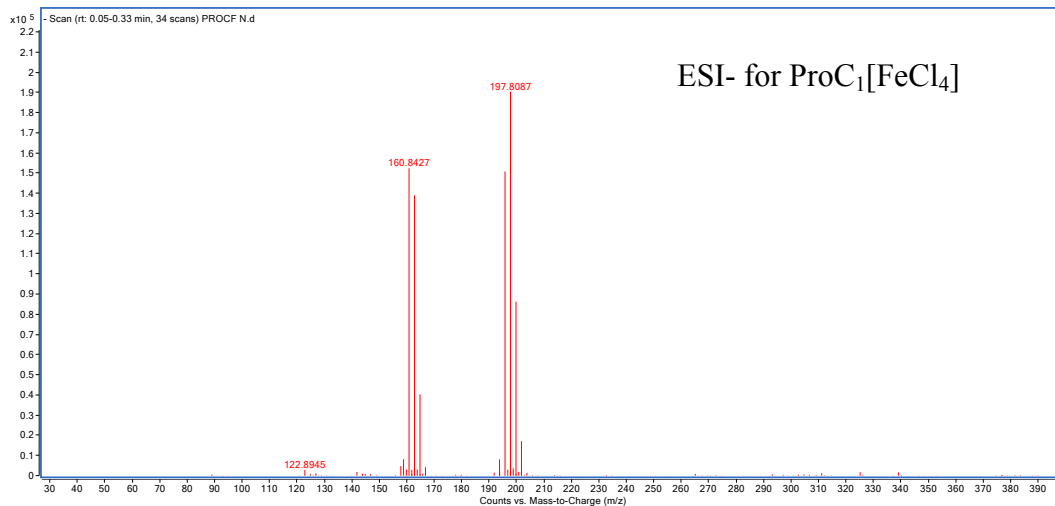

5. LCMS Data of AlaC<sub>1</sub>[FeCl<sub>4</sub>]: ESI<sup>+</sup> (m/z) 104.03 for [C<sub>3</sub>H<sub>8</sub>NO<sub>2</sub>]<sup>+</sup>, ESI<sup>-</sup> (m/z) 197.80 for [FeCl<sub>4</sub>]<sup>-</sup>

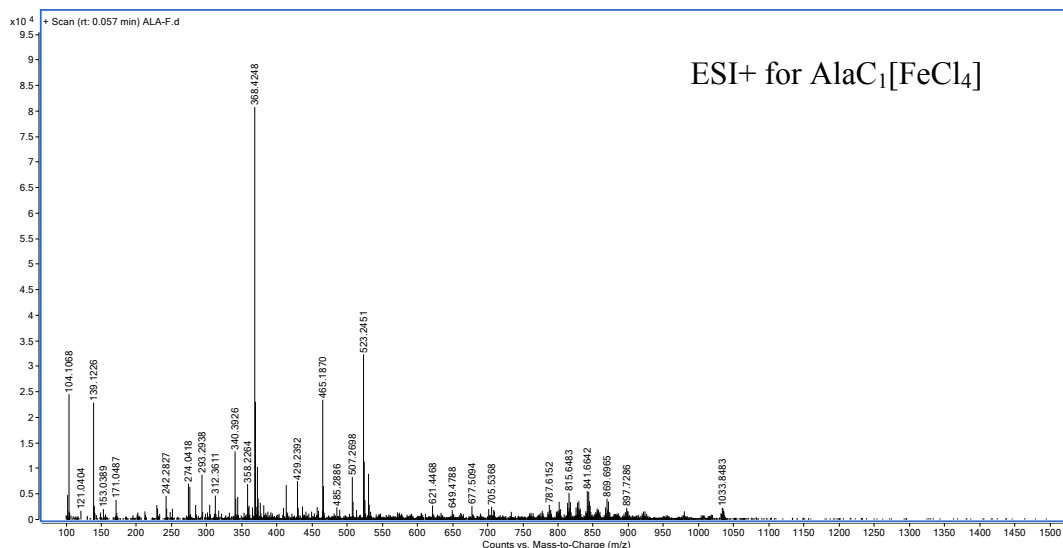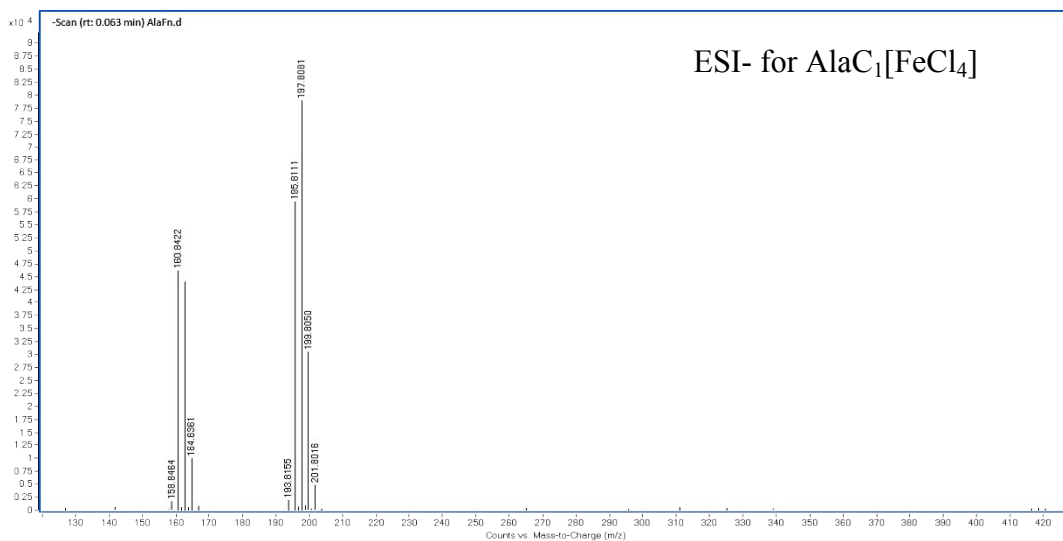

6. LCMS Data of ValC<sub>1</sub>[FeCl<sub>4</sub>]: ESI<sup>+</sup> (m/z) 132.1 for [C<sub>5</sub>H<sub>12</sub>NO<sub>2</sub>]<sup>+</sup>, ESI<sup>-</sup> (m/z) 197.80 for [FeCl<sub>4</sub>]<sup>-</sup>

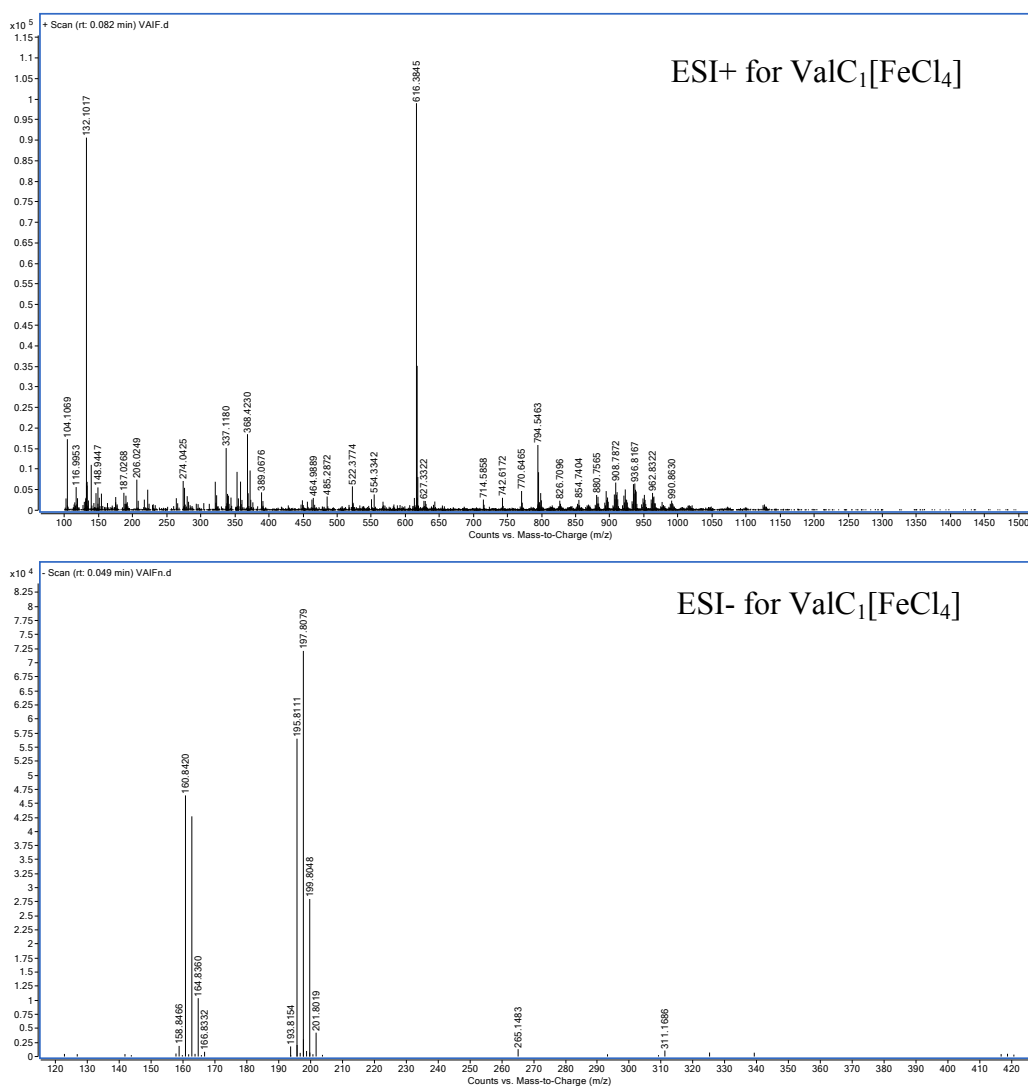

**Figure S13.** LCMS data of synthesised PMILs (Pro[FeCl<sub>4</sub>], Glu[FeCl<sub>4</sub>], GluC<sub>1</sub>[FeCl<sub>4</sub>], ProC<sub>1</sub>[FeCl<sub>4</sub>], AlaC<sub>1</sub>[FeCl<sub>4</sub>], and ValC<sub>1</sub>[FeCl<sub>4</sub>]).
